# Supplementary material for: Multi-locus Analysis of Genomic Time Series Data from Experimental Evolution
Source: PubMed Central journal article supplement (PMC4388667; doi:10.1371/journal.pgen.1005069), 2015-04-07
Supplement: pgen.1005069.s001.pdf [file pgen.1005069.s001.pdf]

## Supporting Information

### Multi-locus analysis of genomic time series data from experimental evolution

Jonathan Terhorst<sup>1</sup>, Christian Schlötterer<sup>4</sup>, Yun S. Song<sup>1,2,3,\*</sup>

<sup>1</sup> Department of Statistics, <sup>2</sup> Computer Science Division, <sup>3</sup> Department of Integrative Biology, University of California, Berkeley, CA, USA

<sup>4</sup> Institut für Populationsgenetik, Vetmeduni Vienna, Vienna, Austria

\* Corresponding author e-mail: yss@cs.berkeley.edu

December 29, 2014

#### Text S1

Here we provide proofs of the theoretical results mentioned in the **Methods** section of the main text.

**Lemma 1.** To order  $O(r + \frac{1}{2N})$ ,

$$\begin{aligned}\mathbb{E}_\pi Z_t^{(i)} &= z^{(i)} + \epsilon_i t r c_0 \left(1 - \frac{t-1}{4N}\right) \\ \mathbb{E}_\pi(r Z_t^{(i)} Z_t^{(j)}) &= \frac{r}{2N} \left[ z^{(i)} z^{(j)} (2N-t) + t z^{(i)} \mathbf{1}\{i=j\} \right] \\ \mathbb{E}_\pi(r Z_t^{(i)} C_t) &= \frac{r}{2N} \left[ z^{(i)} c_0 (2N-3t) + \frac{t}{2} \left( (1-\epsilon_i) z^{(1)} z^{(4)} - (1+\epsilon_i) z^{(2)} z^{(3)} \right) \right].\end{aligned}$$

*Proof of Lemma 1.* By direct computation using the moment generating function of the multinomial distribution, we find that

$$\begin{aligned}\mathbb{E}_\pi(Z_t^{(i)} | \mathbf{Z}_{t-1}) &= Z_{t-1}^{(i)} + \epsilon_i r C_{t-1} \\ \mathbb{E}_\pi(r Z_t^{(i)} Z_t^{(j)} | \mathbf{Z}_{t-1}) &= r Z_{t-1}^{(i)} Z_{t-1}^{(j)} \left(1 - \frac{1}{N}\right) + Z_{t-1}^{(i)} \mathbf{1}\{i=j\} + O(r^2 + 1/N^2) \\ \mathbb{E}_\pi(r C_t Z_t^{(i)} | \mathbf{Z}_{t-1}) &= \frac{r}{N} \left[ Z_{t-1}^{(i)} C_{t-1} (N-3) \right. \\ &\quad \left. + \frac{1}{2} \left( (1-\epsilon_i) z^{(1)} z^{(4)} - (1+\epsilon_i) z^{(2)} z^{(3)} \right) \right] + O(r^2 + 1/N^2).\end{aligned}$$

The results now follow by induction. □

**Corollary 2.** To order  $O(r + \frac{1}{2N})$ ,

$$\begin{aligned}\mathbb{E}_\pi \left( Z_t^{(i)} Z_t^{(j)} \right) &= z^{(i)} z^{(j)} + \epsilon_i \epsilon_j t r c_0 (\epsilon_i z^{(i)} + \epsilon_j z^{(j)}) + \frac{t}{2N} \left( -z^{(i)} z^{(j)} \mathbf{1}\{i \neq j\} + z^{(i)} (1 - z^{(j)}) \mathbf{1}\{i=j\} \right) \\ &\quad \frac{rt}{2N} \left\{ \frac{1}{2} (t+1 - |\epsilon_i - \epsilon_j|) \left( z^{(1)} z^{(4)} + z^{(2)} z^{(3)} \right) - \epsilon_i \epsilon_j c_0 (2t-1) (\epsilon_i z^{(i)} + \epsilon_j z^{(j)}) - \right. \\ &\quad \left. \frac{1}{8} |\epsilon_i + \epsilon_j| \left[ c_0 (\epsilon_i + \epsilon_j) (t+1) \mathbf{1}\{i \neq j\} + 4t \left( (\epsilon_i + 1) z^{(2)} z^{(3)} + (1 - \epsilon_i) z^{(1)} z^{(4)} \right) \right] \right\}.\end{aligned}$$

*Proof of Corollary 2.* The formula is obtained by considering the conditional expectation  $\mathbb{E}_\pi(Z_t^{(i)}Z_t^{(j)} \mid \mathbf{Z}_{t-1})$ , inducting on  $t$  and checking cases for  $i$  and  $j$ . We illustrate the proof for the case  $i = j = 1$  and omit the lengthy but routine computations used to check the remaining cases. (A Mathematica notebook which checks all cases is available from the authors upon request.) With  $i = j = 1$  we have

$$\begin{aligned} \mathbb{E}_\pi \left[ \left( Z_t^{(1)} \right)^2 \mid \mathbf{Z}_{t-1} \right] &= \frac{1}{N} \left[ Z_{t-1}^{(1)}(1 - Z_{t-1}^{(1)}) - rC_{t-1} \left( 1 - 2Z_{t-1}^{(1)} \right) \right] \\ &\quad - rC_{t-1}Z_{t-1}^{(1)} + O(r^2 + 1/N^2). \end{aligned}$$

This yields the claim for  $t = 1$ . Taking expectation and applying the preceding lemma, we find that

$$\begin{aligned} \mathbb{E}_\pi \left[ \left( Z_t^{(1)} \right)^2 \right] &= \frac{1}{N} \left[ z_1 - trc_0 + (N - 1)\mathbb{E}_\pi \left( Z_{t-1}^{(1)} \right)^2 - \right. \\ &\quad \left. 2rz_1 (c_0(N - 3t + 3) + (t - 1)z_4) \right] + O(r^2 + 1/N^2). \end{aligned}$$

Applying the inductive hypothesis, we obtain

$$\begin{aligned} \mathbb{E}_\pi \left[ \left( Z_t^{(1)} \right)^2 \right] &= \frac{1}{N} \left[ z_1 - trc_0 + z_1 (t - 1 + (n - t + 1)z_1 - (t - 1)(t - 2)rz_4) - \right. \\ &\quad \left. (t - 1)rc_0 \left[ \frac{t}{2} + 2(n - 2t + 3)z_1 \right] - z_1^2 + 2trc_0z_1 - \right. \\ &\quad \left. 2rz_1 (c_0(n - 3t + 3) + (t - 1)z_4) \right] + O(r^2 + 1/N^2), \end{aligned}$$

which agrees with the claim after some simplification.  $\square$
