# Supplementary material for: Multi-locus Analysis of Genomic Time Series Data from Experimental Evolution
Source: PubMed Central journal article supplement (PMC4388667; doi:10.1371/journal.pgen.1005069), 2015-04-07

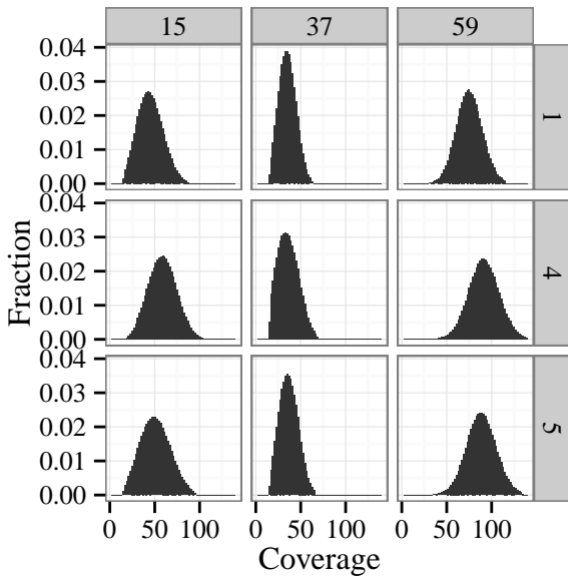

Supplement: pgen.1005069.s003.pdf [file pgen.1005069.s003.pdf]
