# Supplementary material for: Multi-locus Analysis of Genomic Time Series Data from Experimental Evolution
Source: PubMed Central journal article supplement (PMC4388667; doi:10.1371/journal.pgen.1005069), 2015-04-07
Supplement: pgen.1005069.s005.pdf [file pgen.1005069.s005.pdf]

**3-locus model**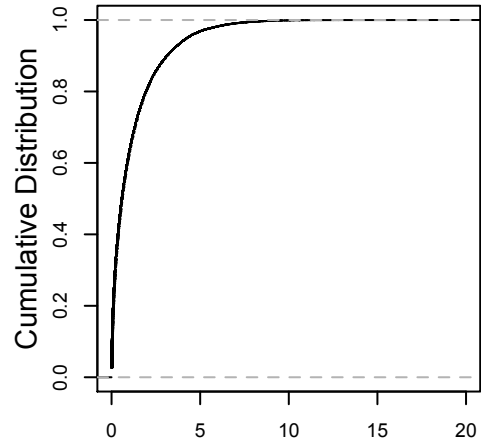

LR statistic

**5-locus model**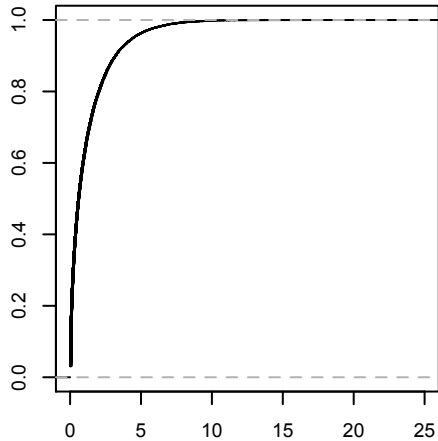

LR statistic

**7-locus model**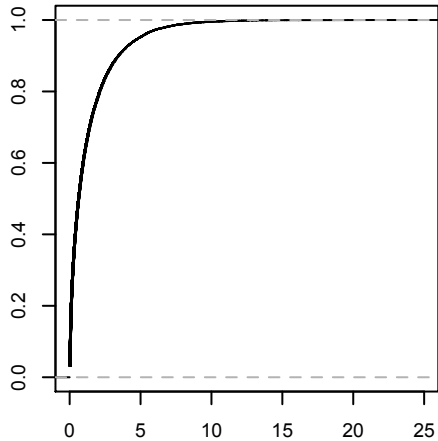

LR statistic
