# Supplementary material for: Multi-locus Analysis of Genomic Time Series Data from Experimental Evolution
Source: PubMed Central journal article supplement (PMC4388667; doi:10.1371/journal.pgen.1005069), 2015-04-07
Supplement: pgen.1005069.s007.pdf [file pgen.1005069.s007.pdf]

| $s$  | $F$  | Distance |        |       |        |       | Rank  |        |       |        |       | $\mathbb{E}(\#\text{SS})$ |
|------|------|----------|--------|-------|--------|-------|-------|--------|-------|--------|-------|---------------------------|
|      |      | $q.1$    | $q.25$ | $q.5$ | $q.75$ | $q.9$ | $q.1$ | $q.25$ | $q.5$ | $q.75$ | $q.9$ |                           |
| 0.02 | 20   | 610      | 8460   | 27420 | 54960  | 68180 | 4     | 12     | 58    | 435    | 753   | 1306                      |
| 0.02 | 200  | 0        | 0      | 12150 | 42921  | 65810 | 1     | 1      | 9     | 113    | 946   | 2082                      |
| 0.02 | 2000 | 0        | 4720   | 22330 | 46610  | 70841 | 1     | 7      | 51    | 301    | 986   | 2779                      |
| 0.05 | 20   | 0        | 0      | 0     | 16050  | 39370 | 1     | 1      | 1     | 4      | 42    | 1311                      |
| 0.05 | 200  | 0        | 0      | 0     | 0      | 3500  | 1     | 1      | 1     | 1      | 3     | 2083                      |
| 0.05 | 2000 | 0        | 0      | 0     | 0      | 14120 | 1     | 1      | 1     | 1      | 5     | 2776                      |
| 0.10 | 20   | 0        | 0      | 0     | 0      | 1340  | 1     | 1      | 1     | 1      | 2     | 1315                      |
| 0.10 | 200  | 0        | 0      | 0     | 0      | 0     | 1     | 1      | 1     | 1      | 1     | 2085                      |
| 0.10 | 2000 | 0        | 0      | 0     | 0      | 0     | 1     | 1      | 1     | 1      | 1     | 2778                      |
